# Supplementary material for: Reducing social isolation and loneliness in older people: a systematic review protocol
Source: PubMed Central journal article supplement — BMJ Open. 2017 May 17;7(5):e013778. doi: 10.1136/bmjopen-2016-013778 (PMC5623425; doi:10.1136/bmjopen-2016-013778), 2017-05-17
Supplement: bmjopen-2016-013778supp001.pdf [file bmjopen-2016-013778supp001.pdf]

# Reducing social isolation in older people: a systematic review protocol

## Supplementary files

|                                                          |   |
|----------------------------------------------------------|---|
| Supplementary file 1: PRISMA-P checklist.....            | 2 |
| Supplementary file 2: Search strategy.....               | 4 |
| Supplementary file 3: Pro-forma for Data Extraction..... | 9 |

## Supplementary file 1: PRISMA-P checklist

Table A.1: PRISMA-P 2015 checklist

| Section and topic                    | Item No. | Checklist Item                                                                                                                                                                                                                | Reported on page #        |
|--------------------------------------|----------|-------------------------------------------------------------------------------------------------------------------------------------------------------------------------------------------------------------------------------|---------------------------|
| <b>A) Administrative Information</b> |          |                                                                                                                                                                                                                               |                           |
| Identification                       | 1a       | Identify the report as a protocol of a systematic review                                                                                                                                                                      | 1                         |
| Update                               | 1b       | Identify protocol as an update of a previous systematic review if applicable                                                                                                                                                  | n/a                       |
| Registration                         | 2        | Name of registry and registration number                                                                                                                                                                                      | 2                         |
| <b>B) Authors</b>                    |          |                                                                                                                                                                                                                               |                           |
| Contact                              |          | Provide name, institutional affiliation, e-mail address of all protocol authors; provide physical mailing address of corresponding author                                                                                     | 1                         |
| Contributions                        |          | Describe contributions of protocol authors and identify the guarantor of the review                                                                                                                                           | 1 + 6 + 7                 |
| Amendments                           |          | If the protocol represents an amendment of a previously completed or published protocol, identify as such and list changes; otherwise, state plan for documenting important protocol amendments                               | n/a                       |
| Support                              |          |                                                                                                                                                                                                                               |                           |
| - Sources                            | 5a       | Indicate Sources of financial or other support for the review                                                                                                                                                                 | 10                        |
| - Sponsor                            | 5b       | Provide name for the review funder and/or sponsor                                                                                                                                                                             | 9                         |
| - Role of sponsor or funder          | 5c       | Describe roles of funder(s), sponsor(s) and/or institution(s), if any, in developing the protocol                                                                                                                             | n/a                       |
| <b>C) Introduction</b>               |          |                                                                                                                                                                                                                               |                           |
| Rationale                            | 6        | Describe the rationale for the review in the context of what is already known                                                                                                                                                 | 3 + 4                     |
| Objectives                           | 7        | Provide an explicit statement of the question(s) the review will address with reference to participants, interventions, comparators, and outcomes (PICO)                                                                      | 3 + 4                     |
| <b>D) Methods</b>                    |          |                                                                                                                                                                                                                               |                           |
| Eligibility Criteria                 | 8        | Specify the study characteristics (such as PICO, study design, setting, time frame) and report characteristics (such as years considered, language, publication status) to be used as criteria for eligibility for the review | 5                         |
| Information Sources                  | 9        | Describe all intended information sources (such as electronic databases, contact with study authors, trial registers or other grey literature sources) with planned dates of coverage                                         | 5 + 6                     |
| Search Strategy                      | 10       | Present draft of search strategy to be used for at least one electronic database, including planned limits, such that it could be repeated                                                                                    | 5 + Additional file 2     |
| <b>E) Study Records</b>              |          |                                                                                                                                                                                                                               |                           |
| Data Management                      | 11a      | Describe the mechanism(s) that will be used to manage records and data throughout the review                                                                                                                                  | 6                         |
| Selection Process                    | 11b      | State the process that will be used for selecting studies (such as two independent reviewers) through each phase of the review (that is, screening, eligibility and inclusion in meta-analysis)                               | 5 - 7                     |
| Data Collection Process              | 11c      | Describe planned method of extracting data from reports (such as piloting forms, done independently, in duplicate), any processes for obtaining and confirming data from investigators                                        | 6 + 8 + Additional file 3 |
| Data Items                           | 12       | List and define all variables for which data will be sought (such as PICO items, funding sources), any pre-planned data assumptions and simplifications                                                                       | 6                         |
| Outcomes and prioritization          | 13       | List and define all outcomes for which data will be sought, including prioritization of main and additional outcomes, with rationale                                                                                          | 6                         |

| Section and topic                  | Item No. | Checklist Item                                                                                                                                                                                                       | Reported on page # |
|------------------------------------|----------|----------------------------------------------------------------------------------------------------------------------------------------------------------------------------------------------------------------------|--------------------|
| Risk of bias in individual studies | 14       | Describe anticipated methods for assessing risk of bias of individual studies, including whether this will be done at the outcome or study level, or both; state how this information will be used in data synthesis | 7                  |
| Data Synthesis                     | 15a      | Describe criteria under which study data will be quantitatively synthesised                                                                                                                                          | 7 + 8              |
|                                    | 15b      | If data are appropriate for quantitative synthesis, describe planned summary measures, methods of handling data and methods of combining data from studies, including any planned exploration of consistency         | 7 + 8              |
|                                    | 15c      | Describe any proposed additional analyses (such as sensitivity or subgroup analyses, meta-regression)                                                                                                                | 7 + 8              |
|                                    | 15d      | If quantitative synthesis is not appropriate, describe the type of summary planned                                                                                                                                   | 7 + 8              |
| Meta-bias(es)                      | 16       | Specify any planned assessment of meta-bias(es) (such as publication bias across studies, selective reporting within studies)                                                                                        | 7                  |
| Confidence in cumulative evidence  | 17       | Describe how the strength of the body of evidence will be assessed                                                                                                                                                   | 7                  |

## Supplementary file 2: Search strategy

**Table A.2.1: Ovid MEDLINE and Embase- search date 15/01/16**

| Searches | Search Terms                                                                    |
|----------|---------------------------------------------------------------------------------|
| 1        | exp "Aged, 80 and over"/ or exp Aged/                                           |
| 2        | older*.ti,ab.                                                                   |
| 3        | elder*.ti,ab.                                                                   |
| 4        | senior*.ti,ab.                                                                  |
| 5        | geriatric.ti,ab.                                                                |
| 6        | aged.ti,ab.                                                                     |
| 7        | OR/1-6                                                                          |
| 8        | Social Isolation/                                                               |
| 9        | Loneliness/                                                                     |
| 10       | isolation.ti,ab.                                                                |
| 11       | loneliness.ti,ab.                                                               |
| 12       | (social* adj3 isolat*).ti,ab.                                                   |
| 13       | (emotional* adj3 isolat*).ti,ab.                                                |
| 14       | OR/ 8-13                                                                        |
| 15       | exp Social Support/                                                             |
| 16       | "social support*".ti,ab.                                                        |
| 17       | loss.ti,ab.                                                                     |
| 18       | access.ti,ab.                                                                   |
| 19       | (social* adj3 activ*).ti,ab.                                                    |
| 20       | "social network*".ti,ab.                                                        |
| 21       | "social intervention*".ti,ab.                                                   |
| 22       | (promot* or prevent* or support* or self-help or "self help" or educat*).ti,ab. |
| 23       | Self Care/                                                                      |
| 24       | exp Policy/                                                                     |
| 25       | policy.ti,ab.                                                                   |
| 26       | program*.ti,ab                                                                  |
| 27       | OR/ 15-26                                                                       |
| 28       | 7 AND 14 AND 27                                                                 |
| 29       | limit 28 to yr="1995 -Current"                                                  |

ti: title; ab: abstract

**Table A.2.2: PsycINFO - search date 15/01/16**

| Searches | Search Terms                                                                    |
|----------|---------------------------------------------------------------------------------|
| 1        | exp "Aged, 80 and over"/ or exp Aged/                                           |
| 2        | older*.ti,ab.                                                                   |
| 3        | elder*.ti,ab.                                                                   |
| 4        | senior*.ti,ab.                                                                  |
| 5        | geriatric.ti,ab.                                                                |
| 6        | aged.ti,ab.                                                                     |
| 7        | OR/1-6                                                                          |
| 8        | Social Isolation/                                                               |
| 9        | Loneliness/                                                                     |
| 10       | isolation.ti,ab.                                                                |
| 11       | loneliness.ti,ab.                                                               |
| 12       | (social* adj3 isolat*).ti,ab.                                                   |
| 13       | (emotional* adj3 isolat*).ti,ab.                                                |
| 14       | OR/ 8-13                                                                        |
| 15       | exp Social Support/                                                             |
| 16       | "social support*".ti,ab.                                                        |
| 17       | loss.ti,ab.                                                                     |
| 18       | access.ti,ab.                                                                   |
| 19       | (social* adj3 activ*).ti,ab.                                                    |
| 20       | "social network*".ti,ab.                                                        |
| 21       | "social intervention*".ti,ab.                                                   |
| 22       | (promot* or prevent* or support* or self-help or "self help" or educat*).ti,ab. |
| 23       | Self Care/                                                                      |
| 24       | exp Policy Making/ or exp Health Care Policy/ or exp Government Policy Making/  |
| 25       | policy.ti,ab.                                                                   |
| 26       | program*.ti,ab                                                                  |
| 27       | OR/ 15-26                                                                       |
| 28       | 7 AND 14 AND 27                                                                 |
| 29       | limit 28 to yr="1995 -Current"                                                  |

ti: title; ab: abstract

**Table A.2.3: Cinahl - search date 15/01/16**

| Searches | Search Terms                                                                                                                                                                                                                            |
|----------|-----------------------------------------------------------------------------------------------------------------------------------------------------------------------------------------------------------------------------------------|
| 1        | exp "Aged, 80 and over"/ or exp Aged/                                                                                                                                                                                                   |
| 2        | older*.ti,ab.                                                                                                                                                                                                                           |
| 3        | elder*.ti,ab.                                                                                                                                                                                                                           |
| 4        | senior*.ti,ab.                                                                                                                                                                                                                          |
| 5        | geriatric.ti,ab.                                                                                                                                                                                                                        |
| 6        | aged.ti,ab.                                                                                                                                                                                                                             |
| 7        | OR/1-6                                                                                                                                                                                                                                  |
| 8        | Social Isolation/                                                                                                                                                                                                                       |
| 9        | Loneliness/                                                                                                                                                                                                                             |
| 10       | isolation.ti,ab.                                                                                                                                                                                                                        |
| 11       | loneliness.ti,ab.                                                                                                                                                                                                                       |
| 12       | (social* adj3 isolat*).ti,ab.                                                                                                                                                                                                           |
| 13       | (emotional* adj3 isolat*).ti,ab.                                                                                                                                                                                                        |
| 14       | OR/ 8-13                                                                                                                                                                                                                                |
| 15       | exp "Support, Psychosocial+"/                                                                                                                                                                                                           |
| 16       | "social support*".ti,ab.                                                                                                                                                                                                                |
| 17       | loss.ti,ab.                                                                                                                                                                                                                             |
| 18       | access.ti,ab.                                                                                                                                                                                                                           |
| 19       | (social* adj3 activ*).ti,ab.                                                                                                                                                                                                            |
| 20       | "social network*".ti,ab.                                                                                                                                                                                                                |
| 21       | "social intervention*".ti,ab.                                                                                                                                                                                                           |
| 22       | (promot* or prevent* or support* or self-help or "self help" or educat*).ti,ab.                                                                                                                                                         |
| 23       | Self Care/                                                                                                                                                                                                                              |
| 24       | (MH "Public Policy+") OR (MH "Policy Making") OR (MH "Policy Studies+") OR (MH "Health Policy Studies") OR (MH "Health Policy+") OR (MH "Policy and Procedure Manuals") OR (MH "Organizational Policies+") OR (MH "Hospital Policies+") |
| 25       | policy.ti,ab.                                                                                                                                                                                                                           |
| 26       | program*.ti,ab                                                                                                                                                                                                                          |
| 27       | OR/ 15-27                                                                                                                                                                                                                               |
| 28       | 7 AND 14 AND 27                                                                                                                                                                                                                         |
| 29       | limit 28 to yr="1995 -Current"                                                                                                                                                                                                          |

ti: title; ab: abstract

**Table A.2.4: ASSIA - search date 20/01/16****Search Terms**

((SU.EXACT.EXPLODE("Terminally ill elderly people") OR SU.EXACT.EXPLODE("Disabled elderly women") OR SU.EXACT.EXPLODE("Low income elderly people") OR SU.EXACT.EXPLODE("Visually impaired elderly women") OR SU.EXACT.EXPLODE("Visually impaired elderly people") OR SU.EXACT.EXPLODE("Terminally ill elderly women") OR SU.EXACT.EXPLODE("Widowed elderly men") OR SU.EXACT.EXPLODE("Married elderly men") OR SU.EXACT.EXPLODE("Terminally ill elderly men") OR SU.EXACT.EXPLODE("Language disordered elderly people") OR SU.EXACT.EXPLODE("Elderly widows") OR SU.EXACT.EXPLODE("Mentally ill elderly women") OR SU.EXACT.EXPLODE("Elderly husbands") OR SU.EXACT.EXPLODE("Remarried elderly people") OR SU.EXACT.EXPLODE("Elderly fathers") OR SU.EXACT.EXPLODE("Sick elderly people") OR SU.EXACT.EXPLODE("Learning disabled elderly people") OR SU.EXACT.EXPLODE("Mentally ill elderly men") OR SU.EXACT.EXPLODE("Divorced elderly people") OR SU.EXACT.EXPLODE("Sick elderly women") OR SU.EXACT.EXPLODE("Emotionally disturbed elderly people") OR SU.EXACT.EXPLODE("Disabled elderly people") OR SU.EXACT.EXPLODE("Elderly married couples") OR SU.EXACT.EXPLODE("Elderly mothers") OR SU.EXACT.EXPLODE("Mentally ill elderly people") OR SU.EXACT.EXPLODE("Disabled elderly men" OR "Elderly men" OR "Married elderly men" OR "Mentally ill elderly men" OR "Terminally ill elderly men" OR "Widowed elderly men") OR SU.EXACT.EXPLODE("Single elderly people") OR SU.EXACT.EXPLODE("Elderly relatives") OR SU.EXACT.EXPLODE("Disabled elderly men") OR SU.EXACT.EXPLODE("Brain damaged elderly people" OR "Centenarians" OR "Disabled elderly people" OR "Divorced elderly people" OR "Elderly people" OR "Emotionally disturbed elderly people" OR "Gifted elderly people" OR "Hearing impaired elderly people" OR "Homeless elderly people" OR "Housebound elderly people" OR "Language disordered elderly people" OR "Learning disabled elderly people" OR "Low income elderly people" OR "Mentally ill elderly people" OR "Remarried elderly people" OR "Retired people" OR "Sick elderly people" OR "Single elderly people" OR "Terminally ill elderly people" OR "Visually impaired elderly people") OR SU.EXACT.EXPLODE("Blind-Deaf elderly women" OR "Disabled elderly women" OR "Elderly women" OR "Married elderly women" OR "Mentally ill elderly women" OR "Sick elderly women" OR "Single elderly women" OR "Terminally ill elderly women" OR "Visually impaired elderly women") OR SU.EXACT.EXPLODE("Homeless elderly people") OR SU.EXACT.EXPLODE("Married elderly women") OR SU.EXACT.EXPLODE("Hearing impaired elderly people") OR SU.EXACT.EXPLODE("Housebound elderly people") OR SU.EXACT.EXPLODE("Elderly housing assistance programmes") OR SU.EXACT.EXPLODE("Elderly parents")) OR (ab(older\* OR elder\* OR senior\* OR geriatric OR aged) OR ti(older\* OR elder\* OR senior\* OR geriatric OR aged))) AND (SU.EXACT.EXPLODE("Isolation" OR "Purdah" OR "Seclusion") OR SU.EXACT.EXPLODE("Loneliness") OR (ti(isolation OR loneliness OR (social\* NEAR/3 isolat\*) OR (emotion\* NEAR/3 isolat\*)) OR ab(isolation OR loneliness OR (social\* NEAR/3 isolat\*) OR (emotion\* NEAR/3 isolat\*))) AND ((SU.EXACT.EXPLODE("Computer based social support" OR "Perceived social support" OR "Social support") OR SU.EXACT.EXPLODE("Perceived social support")) OR SU.EXACT.EXPLODE("Selfcare") OR SU.EXACT.EXPLODE("Agricultural policy" OR "Colonial policy" OR "Constitutional policy" OR "Criminal justice policy" OR "Criminal policy" OR "Economic policy" OR "Energy policy" OR "Environmental policy" OR "Fiscal equalization" OR "Fiscal policy" OR "Foreign policy" OR "Health policy" OR "Housing policy" OR "Incomes policy" OR "Industrial policy" OR "Mental health policy" OR "Monetary policy" OR "Organizational policy" OR "Penal policy" OR "Policy" OR "Public health policy" OR "Public policy" OR "Regional policy" OR "Science policy" OR "Social housing policy" OR "Social policy" OR "Technological policy" OR "Transport policy" OR "Urban policy" OR "Welfare policy") OR (ab("social support\*") OR ti("social support\*")) OR (ab(loss) OR ti(loss)) OR (ab(access) OR ti(access)) OR (ab((social\* NEAR/3 activ\*) OR "social network\*" OR "social intervention\*") OR ti((social\* NEAR/3 activ\*) OR "social network\*" OR "social intervention\*")) OR (ab(promot\* OR prevent\* OR support\* OR self-help OR "self help" OR educat\*) OR ti(promot\* OR prevent\* OR support\* OR self-help OR "self help" OR educat\*)) OR (ab(policy OR program\*) OR ti(policy OR program\*)))

**Table A.2.5: LILACS - search date 21/01/16****Search Terms**

(aged OR older\* OR elder\* OR senior\* OR geriatric) AND (isolat\* OR loneliness) AND ("social support\*" OR loss OR access OR "social\* activ\*" OR "social network\*" OR "social intervention\*" OR promot\* OR prevent\* OR support\* OR self-help OR "self help" OR educat\* OR policy OR program\*)

**Table A.2.6: OpenGrey - search date 21/01/16**

| Search Terms                                                                                                                                                                                                                                                                                 |
|----------------------------------------------------------------------------------------------------------------------------------------------------------------------------------------------------------------------------------------------------------------------------------------------|
| (aged OR older* OR elder* OR senior* OR geriatric) AND (isolat* OR loneliness) AND ("social support*" OR loss OR access OR "social* activ*" OR "social network*" OR "social intervention*" OR promot* OR prevent* OR support* OR self-help OR "self help" OR educat* OR policy OR program*)) |

**Table A.2.7: The Cochrane Library – search date 21/01/16**

| Searches | Search Terms                                                                     |
|----------|----------------------------------------------------------------------------------|
| 1        | MeSH descriptor: [Aged] explode all trees                                        |
| 2        | older* or aged or elder* or senior* or geriatric.ti,ab.                          |
| 3        | #1 or #2                                                                         |
| 4        | MeSH descriptor: [Social Isolation] explode all trees                            |
| 5        | isolation.ti,ab.                                                                 |
| 6        | loneliness.ti,ab.                                                                |
| 7        | (social* near/3 isolat*) .ti,ab.                                                 |
| 8        | (emotional* near/3 isolat*) .ti,ab.                                              |
| 9        | #4 or #5 or #6 or #7 or #8                                                       |
| 10       | MeSH descriptor: [Social Support] explode all trees                              |
| 11       | "social support*" .ti,ab.                                                        |
| 12       | loss.ti,ab.                                                                      |
| 13       | access.ti,ab.                                                                    |
| 14       | (social* near/3 activ*) .ti,ab.                                                  |
| 15       | "social network*" .ti,ab.                                                        |
| 16       | "social intervention*" .ti,ab.                                                   |
| 17       | (promot* or prevent* or support* or self-help or "self help" or educat*) .ti,ab. |
| 18       | MeSH descriptor: [Self Care] explode all trees                                   |
| 19       | MeSH descriptor: [Policy] explode all trees                                      |
| 20       | policy.ti,ab.                                                                    |
| 21       | program*.ti,ab.                                                                  |
| 22       | #10 or #11 or #12 or #13 or #14 or #15 or #16 or #17 or #18 or #19 or #20 or #21 |
| 23       | <b>#3 and #9 and #22</b>                                                         |
|          | <b>Limit by date: 1995 to present</b>                                            |

ti: title; ab: abstract

### Supplementary file 3: Pro-forma for Data Extraction

|                     |  |
|---------------------|--|
| Reviewer            |  |
| Date form completed |  |

#### Study Details

|                           |  |
|---------------------------|--|
| Title                     |  |
| Author                    |  |
| Year Published            |  |
| Journal                   |  |
| Location (country/city)   |  |
| Language (if not English) |  |

|                                 |                                                                                                                                                                                                                                                | Location in text<br>(page/figure/table/other) |
|---------------------------------|------------------------------------------------------------------------------------------------------------------------------------------------------------------------------------------------------------------------------------------------|-----------------------------------------------|
| <b>Type of study</b>            | Randomised controlled trial <input type="checkbox"/><br>Non-randomised controlled trial <input type="checkbox"/><br>Controlled before and after study <input type="checkbox"/><br>Uncontrolled before and after study <input type="checkbox"/> |                                               |
| <b>A. Start Date</b>            | A.                                                                                                                                                                                                                                             |                                               |
| <b>B. End Date</b>              | B.                                                                                                                                                                                                                                             |                                               |
| <b>Outcomes Measured (aims)</b> |                                                                                                                                                                                                                                                |                                               |

#### Participants

|                                                                  |                                                                                                                                                                            | Location in text<br>(page/figure/table/other) |
|------------------------------------------------------------------|----------------------------------------------------------------------------------------------------------------------------------------------------------------------------|-----------------------------------------------|
| <b>Setting</b>                                                   | Large population in unspecified setting <input type="checkbox"/><br>Community: ..... <input type="checkbox"/><br>Supported living <input type="checkbox"/><br>Other: ..... |                                               |
| <b>Type of Participants</b>                                      |                                                                                                                                                                            |                                               |
| <b>Enrolment Eligibility</b>                                     |                                                                                                                                                                            |                                               |
| <b>A. Inclusion Criteria</b>                                     | A.                                                                                                                                                                         |                                               |
| <b>B. Exclusion Criteria</b>                                     | B.                                                                                                                                                                         |                                               |
| <b>Recruitment process (e.g. phone, mail, clinic)</b>            |                                                                                                                                                                            |                                               |
| <b>Total number randomised (or total population for non-RCT)</b> |                                                                                                                                                                            |                                               |
| <b>Age range (mean age)</b>                                      |                                                                                                                                                                            |                                               |
| <b>Gender (% female)</b>                                         |                                                                                                                                                                            |                                               |
| <b>Ethnicity</b>                                                 |                                                                                                                                                                            |                                               |
| <b>Sample size</b>                                               |                                                                                                                                                                            |                                               |
| <b>Any other relevant sociodemographic information</b>           |                                                                                                                                                                            |                                               |
| <b>Any subgroups established</b>                                 |                                                                                                                                                                            |                                               |
| <b>Notes</b>                                                     |                                                                                                                                                                            |                                               |

### Intervention

|                             |                                                                                                  | Location in text<br>(page/figure/table/other)                                                                                                                                                                                                                                                                                 |
|-----------------------------|--------------------------------------------------------------------------------------------------|-------------------------------------------------------------------------------------------------------------------------------------------------------------------------------------------------------------------------------------------------------------------------------------------------------------------------------|
| <b>Intervention</b>         | Description                                                                                      |                                                                                                                                                                                                                                                                                                                               |
|                             | Duration of each intervention episode                                                            |                                                                                                                                                                                                                                                                                                                               |
|                             | Duration of intervention studied (total study duration)                                          |                                                                                                                                                                                                                                                                                                                               |
|                             | Frequency (daily/weekly etc.)                                                                    |                                                                                                                                                                                                                                                                                                                               |
|                             | Provider (i.e. no., profession, training)                                                        |                                                                                                                                                                                                                                                                                                                               |
|                             | Economic information (cost, resource requirements)                                               |                                                                                                                                                                                                                                                                                                                               |
| <b>Type of intervention</b> | Group Intervention                                                                               | Community based:<br>At home <input type="checkbox"/><br>Centralised location <input type="checkbox"/><br>Supported Living* <input type="checkbox"/>                                                                                                                                                                           |
|                             | One-to-one Intervention                                                                          | Community based:<br>At home <input type="checkbox"/><br>Centralised location <input type="checkbox"/><br>Supported Living* <input type="checkbox"/>                                                                                                                                                                           |
|                             | Focus of intervention                                                                            | Social skills training <input type="checkbox"/><br>Enhanced social support <input type="checkbox"/><br>Increased opportunity for social interaction <input type="checkbox"/><br>Social cognitive training <input type="checkbox"/><br>Provision of services** <input type="checkbox"/><br>Other..... <input type="checkbox"/> |
| <b>Intervention Mode</b>    | Technology assisted <input type="checkbox"/><br>Non-technology assisted <input type="checkbox"/> |                                                                                                                                                                                                                                                                                                                               |
| <b>Compliance</b>           |                                                                                                  |                                                                                                                                                                                                                                                                                                                               |
| <b>Notes</b>                |                                                                                                  |                                                                                                                                                                                                                                                                                                                               |

### Outcomes

|                                                                      | Description as stated in paper/report                                                     | Location in text<br>(page/figure/table/other) |
|----------------------------------------------------------------------|-------------------------------------------------------------------------------------------|-----------------------------------------------|
| <b>Measure of social isolation/loneliness</b>                        |                                                                                           |                                               |
| <b>Outcome tool validated</b>                                        | Yes <input type="checkbox"/> No <input type="checkbox"/> Unclear <input type="checkbox"/> |                                               |
| <b>Any outcomes other than social isolation/loneliness measured?</b> | Yes <input type="checkbox"/><br>Details .....                                             |                                               |
|                                                                      | No <input type="checkbox"/>                                                               |                                               |

**Results: effect of the intervention on social isolation or loneliness**

|                                                       |                                                                                                          | Location in text<br>(page/figure/<br>table/other) |                 |      |                                 |                 |  |
|-------------------------------------------------------|----------------------------------------------------------------------------------------------------------|---------------------------------------------------|-----------------|------|---------------------------------|-----------------|--|
| <b>Comparison</b>                                     |                                                                                                          |                                                   |                 |      |                                 |                 |  |
| <b>Outcome</b>                                        |                                                                                                          |                                                   |                 |      |                                 |                 |  |
| <b>Subgroup</b>                                       |                                                                                                          |                                                   |                 |      |                                 |                 |  |
| <b>Time point (from start or end of intervention)</b> |                                                                                                          |                                                   |                 |      |                                 |                 |  |
| <b>Results</b>                                        | Intervention                                                                                             | Comparison                                        |                 |      |                                 |                 |  |
|                                                       | Mean                                                                                                     | SD (or other variance, specify)                   | No participants | Mean | SD (or other variance, specify) | No participants |  |
|                                                       |                                                                                                          |                                                   |                 |      |                                 |                 |  |
| <b>Effect size</b>                                    | Effect size: _____<br>Standard error: _____<br>Inverse variance: _____<br>95% confidence interval: _____ |                                                   |                 |      |                                 |                 |  |
| <b>Any other results reported (e.g. Odds ratio)</b>   |                                                                                                          |                                                   |                 |      |                                 |                 |  |
| <b>Statistical method used</b>                        |                                                                                                          |                                                   |                 |      |                                 |                 |  |
| <b>Notes</b>                                          |                                                                                                          |                                                   |                 |      |                                 |                 |  |

**Results: effects of the intervention on other outcome continuous variables**

|                                                       |                                                                                                          | Location in text<br>(page/figure/<br>table/other) |                 |      |                                 |                 |  |
|-------------------------------------------------------|----------------------------------------------------------------------------------------------------------|---------------------------------------------------|-----------------|------|---------------------------------|-----------------|--|
| <b>Comparison</b>                                     |                                                                                                          |                                                   |                 |      |                                 |                 |  |
| <b>Outcome</b>                                        |                                                                                                          |                                                   |                 |      |                                 |                 |  |
| <b>Subgroup</b>                                       |                                                                                                          |                                                   |                 |      |                                 |                 |  |
| <b>Time point (from start or end of intervention)</b> |                                                                                                          |                                                   |                 |      |                                 |                 |  |
| <b>Results</b>                                        | Intervention                                                                                             | Comparison                                        |                 |      |                                 |                 |  |
|                                                       | Mean                                                                                                     | SD (or other variance, specify)                   | No participants | Mean | SD (or other variance, specify) | No participants |  |
|                                                       |                                                                                                          |                                                   |                 |      |                                 |                 |  |
| <b>Effect size</b>                                    | Effect size: _____<br>Standard error: _____<br>Inverse variance: _____<br>95% confidence interval: _____ |                                                   |                 |      |                                 |                 |  |
| <b>Any other results reported (e.g. Odds ratio)</b>   |                                                                                                          |                                                   |                 |      |                                 |                 |  |
| <b>Statistical Method used</b>                        |                                                                                                          |                                                   |                 |      |                                 |                 |  |
| <b>Notes</b>                                          |                                                                                                          |                                                   |                 |      |                                 |                 |  |

**Results: effect of the intervention on other outcome categorical variables**

|                                                       |                |              |                |              | Location in text<br>(page/figure/table/other) |
|-------------------------------------------------------|----------------|--------------|----------------|--------------|-----------------------------------------------|
| <b>Comparison</b>                                     |                |              |                |              |                                               |
| <b>Outcome</b>                                        |                |              |                |              |                                               |
| <b>Subgroup</b>                                       |                |              |                |              |                                               |
| <b>Time point (from start or end of intervention)</b> |                |              |                |              |                                               |
| <b>Results</b>                                        | Intervention   |              | Comparison     |              |                                               |
|                                                       | No. with event | No. in group | No. with event | No. in group |                                               |
|                                                       |                |              |                |              |                                               |
| <b>Effect size (95% CI)</b>                           |                |              |                |              |                                               |
| <b>Any other results reported (e.g. Odds ratio)</b>   |                |              |                |              |                                               |
| <b>Statistical method used</b>                        |                |              |                |              |                                               |
| <b>Notes</b>                                          |                |              |                |              |                                               |

**Other Information**

|                                             |  |  |  |  | Location in text<br>(page/figure/table/other) |
|---------------------------------------------|--|--|--|--|-----------------------------------------------|
| <b>Author's conclusions</b>                 |  |  |  |  |                                               |
| <b>References to other relevant studies</b> |  |  |  |  |                                               |
| <b>Reviewer's conclusions</b>               |  |  |  |  |                                               |
| <b>Notes</b>                                |  |  |  |  |                                               |

\*Residential or nursing care

\*\*Provision of services such as transport, medical services, etc.
